# Supplementary material for: Development of a 45K pepper GBTS liquid-phase gene chip and its application in genome-wide association studies
Source: Front Plant Sci. 2024 Jun 25;15:1405190. doi: 10.3389/fpls.2024.1405190 (PMC11231373; doi:10.3389/fpls.2024.1405190)
Supplement: Supplementary file 2 [file Table_1.xlsx]

## Sheet: Table_S1
Accession No.	characteristic
22C554	small horn-shaped，sweet，non-helical
22C558	small horn-shaped，sweet，non-helical
22C1911	small horn-shaped，sweet，non-helical
22C564	bell-shaped ,sweet，non-helical
22C566	bell-shaped (selected from a cross between 22C564 and Capsicum chinense)，non-helical
22C568	bell-shaped ,sweet，non-helical
22C573	bell-shaped ,sweet，non-helical
22C577	bell-shaped ,sweet，non-helical
22C579	bell-shaped ,sweet，non-helical
22C586	bell-shaped ,sweet，non-helical
22C588	bell-shaped ,sweet，non-helical
22C589	bell-shaped ,sweet，non-helical
22C593	bell-shaped ,sweet，non-helical
22C596	bell-shaped ,sweet，non-helical
22C598	bell-shaped ,sweet，non-helical
22C1917	bell-shaped ,sweet，non-helical
22C606	bell-shaped ,sweet，non-helical
22C608	bell-shaped ,sweet，non-helical
22C616	bell-shaped ,sweet，non-helical
22C627	bell-shaped ,sweet，non-helical
22C628	bell-shaped ,sweet，non-helical
22C629	bell-shaped ,sweet，non-helical
22C630	bell-shaped ,sweet，non-helical
22C729	horn-shaped， ,sweet，non-helical
22C632	bell-shaped，moderately spicy，non-helical
22C636	bell-shaped，moderately spicy，non-helical
22C642	bell-shaped，moderately spicy (a mutant of 22C636)，non-helical
22C646	bell-shaped，moderately spicy，non-helical
22C647	horsemouth-shaped，moderately spicy，non-helical
22C649	horsemouth-shaped，moderately spicy，non-helical
22C650	horsemouth-shaped，moderately spicy，non-helical
22C656	bell-shaped，moderately spicy，non-helical
22C661	bell-shaped，moderately spicy，non-helical
22CF67	horsemouth-shaped，moderately spicy，non-helical
22C675	bell-shaped，moderately spicy，non-helical
22C680	horsemouth-shaped，moderately spicy，non-helical
22C681	horsemouth-shaped，moderately spicy，non-helical
22C687	horsemouth-shaped，moderately spicy，non-helical
22C688	horsemouth-shaped，moderately spicy，non-helical
22C691	horsemouth-shaped，moderately spicy，non-helical
22C692	horsemouth-shaped，moderately spicy，non-helical
22C694	horn-shaped，moderately spicy，non-helical
22C695	horn-shaped，moderately spicy，non-helical
22C704	bell-shaped，moderately spicy，non-helical
22C703	bell-shaped，moderately spicy，non-helical
22C705	bell-shaped，moderately spicy，non-helical
22C706	bell-shaped，moderately spicy，non-helical
22C707	bell-shaped，moderately spicy，non-helical
22C708	horn-shaped，moderately spicy，non-helical
22C709	horn-shaped，moderately spicy，non-helical
22CF82	horn-shaped，moderately spicy，non-helical
22C712	horn-shaped，moderately spicy，non-helical
22C713	small horsemouth-shaped，moderately spicy，non-helical
22C715	small horsemouth-shaped，moderately spicy，non-helical
22C716	small horsemouth-shaped，moderately spicy，non-helical
22C721	small horsemouth-shaped，moderately spicy，non-helical
22C728	horn-shaped，moderately spicy，non-helical
22C731	bell-shaped，moderately spicy，non-helical
22C732	small sheep horn-shaped，moderately spicy，non-helical
22C733	small sheep horn-shaped，moderately spicy，non-helical
22C734	bullet-shaped，moderately spicy，non-helical
22C735	small horsemouth-shaped，moderately spicy，non-helical
22C736	bullet-shaped，moderately spicy，non-helical
22C1018	long horn-shaped，moderately spicy，non-helical
22C738	bullet-shaped，moderately spicy，non-helical
22C740	bullet-shaped，moderately spicy，non-helical
22C742	bullet-shaped，moderately spicy，non-helical
22C743	bullet-shaped，moderately spicy，non-helical
22C747	bullet-shaped，moderately spicy，non-helical
22C749	bullet-shaped，moderately spicy，non-helical
22C752	bullet-shaped，moderately spicy，non-helical
22C756	bullet-shaped，moderately spicy，non-helical
22C757	horn-shaped， ,sweet，non-helical
22C1925	#N/A
22C759	horn-shaped， ,sweet，non-helical
22C760	horn-shaped， ,sweet (与22C759为姊妹系)，non-helical
22C761	horn-shaped， ,sweet，non-helical
22C823	long horn-shaped，mildly spicy，non-helical
22Q4002	#N/A
22CF29	#N/A
22CF7	#N/A
22CF22	#N/A
22CF47	long horn-shaped，moderately spicy，non-helical
22CF48-1	#N/A
22CF49	long horn-shaped，moderately spicy (AB lines of 22CF47，harboring msc-1, backcross with 22CF47, backcross 5 times)，non-helical
22C1897	long horn-shaped，moderately spicy (AB lines of 22CF47，harboring msc-1, backcross with 22CF47, backcross 6 times)，non-helical
22CF54	#N/A
22C772	long horn-shaped，moderately spicy (inbred line generated from a cross between 22CF47 and 22C896)，non-helical
22C788	long horn-shaped，moderately spicy (inbred line generated from a cross between 22CF47 and 22C922)，non-helical
22CF507	#N/A
22C826	long horn-shaped，mildly spicy，non-helical
22C827	long horn-shaped，mildly spicy (harboring Rf，inbred line which generated by backcrossing with 22C826 for 8 times)，non-helical
22C828	long horn-shaped，mildly spicy (harboring Rf，inbred line which generated by backcrossing with 22C826 for 8 times)，non-helical
22C858	long sheep horn-shaped，moderately spicy (harboring Rf, inbred line which generated by backcrossing with 22C851 for 2 times)，non-helical
22C886	long sheep horn-shaped，moderately spicy，non-helical
22C890	long sheep horn-shaped，moderately spicy (different lineage from 22C886)，non-helical
22C896	long sheep horn-shaped，moderately spicy，non-helical
22C902	long sheep horn-shaped，moderately spicy (different lineage from 22C896)，non-helical
22C907	long sheep horn-shaped，moderately spicy，non-helical
22C913	long sheep horn-shaped，moderately spicy，non-helical
22C922	long sheep horn-shaped，moderately spicy (different lineage from 22C896)，non-helical
22C916	long sheep horn-shaped，moderately spicy，non-helical
22C930	long sheep horn-shaped，moderately spicy，non-helical
22C935	#N/A
22C936	long sheep horn-shaped，moderately spicy，non-helical
22CF517	long sheep horn-shaped，moderately spicy，non-helical
22C939	long sheep horn-shaped，moderately spicy，non-helical
22C944	long sheep horn-shaped，moderately spicy，non-helical
22C945	long sheep horn-shaped，moderately spicy，non-helical
22CF520	long sheep horn-shaped，moderately spicy，non-helical
22C948	long sheep horn-shaped，moderately spicy，non-helical
22C991	long sheep horn-shaped，moderately spicy，non-helical
22C990	long sheep horn-shaped，moderately spicy，non-helical
22C992	long sheep horn-shaped，moderately spicy，non-helical
22C994	long sheep horn-shaped，moderately spicy，non-helical
22C953	long sheep horn-shaped，moderately spicy，non-helical
22C955	long horn-shaped，moderately spicy，non-helical
22C956	long horn-shaped，moderately spicy，non-helical
22C963	long horn-shaped，moderately spicy，non-helical
22C966	#N/A
22C968	long horn-shaped，moderately spicy，non-helical
22C970	long horn-shaped，moderately spicy，non-helical
22C977	long horn-shaped，moderately spicy，non-helical
22C985	long sheep horn-shaped，moderately spicy，non-helical
22C986	long sheep horn-shaped，moderately spicy，non-helical
22C987	long sheep horn-shaped，moderately spicy，non-helical
22C988	long sheep horn-shaped，moderately spicy，non-helical
22C996	long sheep horn-shaped，moderately spicy，non-helical
22C1009	long sheep horn-shaped，moderately spicy，non-helical
22C1010	long sheep horn-shaped，moderately spicy，non-helical
22C1011	long sheep horn-shaped，moderately spicy，non-helical
22C1016	long horn-shaped，moderately spicy，non-helical
22C1027	long horn-shaped，moderately spicy，non-helical
22C1031	long horn-shaped，moderately spicy，non-helical
22C1032	long horn-shaped，moderately spicy，non-helical
22C1033	long horn-shaped，moderately spicy，non-helical
22C1037	long horn-shaped，moderately spicy，non-helical
22C1038	horn-shaped helical-shaped，moderately spicy，non-helical
22C1947	sheep horn-shaped，moderately spicy，non-helical
22Q4306	long sheep horn-shaped，moderately spicy，non-helical
22Q4307	long sheep horn-shaped helical-shaped，moderately spicy，non-helical
22C1046	sheep horn-shaped helical-shaped，moderately spicy，helical
22C1047	sheep horn-shaped helical-shaped，moderately spicy，helical
22C1055	horn-shaped helical-shaped，moderately spicy，helical
22C1061	horn-shaped helical-shaped，moderately spicy，helical
22C1063	horn-shaped helical-shaped，moderately spicy，helical
22C1067	horn-shaped helical-shaped，moderately spicy，helical
22C1068	horn-shaped helical-shaped，moderately spicy，helical
22C1070	horn-shaped helical-shaped，moderately spicy，helical
22C1072	horn-shaped helical-shaped，moderately spicy，helical
22C1075	horn-shaped helical-shaped，moderately spicy，helical
22C1079	sheep horn-shaped helical-shaped，moderately spicy，helical
22C1085	sheep horn-shaped helical-shaped，moderately spicy，helical
22CF91	sheep horn-shaped helical-shaped，moderately spicy，helical
22C1097	sheep horn-shaped helical-shaped，moderately spicy，helical
22CF93	sheep horn-shaped helical-shaped，moderately spicy，helical
22CF96	sheep horn-shaped helical-shaped，moderately spicy，helical
22CF95	sheep horn-shaped helical-shaped，moderately spicy，helical
22C1115	sheep horn-shaped helical-shaped，moderately spicy，helical
22CF88	sheep horn-shaped helical-shaped，moderately spicy，helical
22C1128	sheep horn-shaped helical-shaped，moderately spicy，helical
22C1120	sheep horn-shaped helical-shaped，moderately spicy，helical
22C1126	sheep horn-shaped helical-shaped，moderately spicy，helical
22C1132	sheep horn-shaped helical-shaped，moderately spicy，helical
22C1134	sheep horn-shaped helical-shaped，moderately spicy，helical
22C1124	sheep horn-shaped helical-shaped，moderately spicy，helical
22C1122	sheep horn-shaped helical-shaped，moderately spicy，non-helical
22C1135	sheep horn-shaped helical-shaped，moderately spicy，helical
22C1137	sheep horn-shaped helical-shaped，moderately spicy，helical
22C1139	sheep horn-shaped helical-shaped，moderately spicy，helical
22C1141	sheep horn-shaped helical-shaped，moderately spicy，helical
22C1144	sheep horn-shaped helical-shaped，moderately spicy，non-helical
22C1148	horn-shaped helical-shaped，moderately spicy，helical
22C1152	horn-shaped helical-shaped，moderately spicy，helical
22C1025	#N/A
22C1028	long horn-shaped，moderately spicy，non-helical
22C1158	slender-shaped helical-shaped，spicy，non-helical
22C1163	slender-shaped helical-shaped，spicy，non-helical
22C1168	slender-shaped helical-shaped，spicy，helical
22C1968	slender-shaped，spicy，non-helical
22C1967	slender-shaped，spicy，helical
22C1174	slender-shaped，spicy，non-helical
22C1176	slender-shaped helical-shaped，spicy，helical
22C1179	slender-shaped helical-shaped，spicy，helical
22C1183	slender-shaped helical-shaped，spicy，helical
22C1921	slender-shaped helical-shaped，spicy，helical
22C1185	slender-shaped helical-shaped，spicy，helical
22C1187	slender-shaped helical-shaped，spicy，non-helical
22C1191	slender-shaped helical-shaped，spicy，helical
22C1193	slender-shaped helical-shaped，spicy，helical
22C1201	slender-shaped helical-shaped，spicy，helical
22C1197	slender-shaped helical-shaped，spicy，helical
22C1203	slender-shaped helical-shaped，spicy，helical
22C1195	slender-shaped helical-shaped，spicy，non-helical
22C1207	slender-shaped，spicy，non-helical
22C1212	slender-shaped，spicy，non-helical
22C1213	slender-shaped，spicy，non-helical
22C1215	slender-shaped，spicy，non-helical
22C1218	slender-shaped，spicy，non-helical
22C1221	slender-shaped，spicy，helical
22C1222	slender-shaped，spicy，non-helical
22C1224	slender-shaped，spicy，non-helical
22C1226	slender-shaped，spicy，non-helical
22C1228	slender-shaped，spicy，non-helical
22C1230	slender-shaped，spicy，non-helical
22C1232	slender-shaped，spicy，non-helical
22C1235	slender-shaped，spicy，non-helical
22C1238	slender-shaped，spicy，non-helical
22C1240	slender-shaped，spicy，non-helical
22C1243	slender-shaped，spicy，helical
22C1245	slender-shaped，spicy，helical
22C1247	slender-shaped，spicy，non-helical
22C1249	slender-shaped，spicy，helical
22C1257	slender-shaped，spicy，non-helical
22C1259	slender-shaped，spicy，non-helical
22C1261	slender-shaped，spicy，non-helical
22C1263	slender-shaped，spicy，non-helical
22C1266	slender-shaped，spicy，non-helical
22C1268	slender-shaped helical-shaped，spicy，helical
22C1269	slender-shaped，spicy，helical
22C1270	slender-shaped，spicy，non-helical
22C1274	slender-shaped，spicy，non-helical
22C1275	slender-shaped，spicy，non-helical
22C1280	small sheep horn-shaped，spicy，helical
22C1281	small sheep horn-shaped，spicy，non-helical
22C1283	small sheep horn-shaped，spicy，helical
22C1287	small sheep horn-shaped，spicy，helical
22C1289	small sheep horn-shaped，spicy，non-helical
22C1291	small sheep horn-shaped，spicy，non-helical
22C1295	small sheep horn-shaped，spicy，non-helical
22C1296	small sheep horn-shaped，spicy，non-helical
22C1299	small sheep horn-shaped，spicy，non-helical
22C1301	small sheep horn-shaped，spicy，non-helical
22C1303	small sheep horn-shaped，spicy，non-helical
22C1305	small sheep horn-shaped，spicy，non-helical
22C1306	small sheep horn-shaped，spicy，non-helical
22C1307	small sheep horn-shaped，spicy，non-helical
22C1308	horn-shaped， ,sweet，non-helical
22C1313	cone-shaped， ,sweet，non-helical
22C1319	cone-shaped， ,sweet，non-helical
22C1321	cone-shaped， ,sweet，non-helical
22C1326	cone-shaped， ,sweet，non-helical
22C1328	cone-shaped， ,sweet，non-helical
22C1332	cone-shaped， ,sweet，non-helical
22C1334	small sheep horn-shaped，spicy，non-helical
22C1340	small sheep horn-shaped，spicy，non-helical
22C1348	small sheep horn-shaped，spicy，non-helical
22C1349	small sheep horn-shaped，spicy，non-helical
22C1352	small sheep horn-shaped，spicy，non-helical
22C1356	small sheep horn-shaped，spicy，non-helical
22C1353	small sheep horn-shaped，spicy，non-helical
22C1354	#N/A
22C1357	small sheep horn-shaped，spicy，non-helical
22C1365	small sheep horn-shaped，spicy，non-helical
22C1366	small sheep horn-shaped，spicy，non-helical
22C1402	solitary pod pepper，non-helical
22C1367	small sheep horn-shaped，spicy，non-helical
22C1371	small sheep horn-shaped，spicy，non-helical
22C1372	small sheep horn-shaped，spicy，non-helical
22C1373	small sheep horn-shaped，spicy，non-helical
22C1376	pod pepper，self-pruning，non-helical
22C1377	solitary pod pepper，non-helical
22C1379	bird pepper，extremely small，non-helical
22C1380	solitary pod pepper，non-helical
22C1381	solitary pod pepper，non-helical
22C1382	solitary pod pepper，non-helical
22C1383	small sheep horn-shaped，spicy，non-helical
22C1384	solitary pod pepper，non-helical
22C1387	cherry-shaped, spicy，non-helical
22C1388	cone-shaped，spicy，non-helical
22C1389	ball-shaped，spicy，non-helical
22C1391	ball-shaped，spicy，non-helical
22C1393	cone-shaped，spicy，non-helical
22C1395	cone-shaped，spicy，non-helical
22C1397	cone-shaped，spicy，non-helical
22C1399	solitary pod pepper，non-helical
22C1400	solitary pod pepper，non-helical
22C1401	solitary pod pepper，non-helical
22C1407	fabiform-shaped，non-helical
22C1409	solitary pod pepper，helical
22C1411	solitary pod pepper，non-helical
22C1412	cone-shaped，spicy，non-helical
22C1413	solitary pod pepper，non-helical
22C1414	solitary pod pepper，non-helical
22C1416	solitary pod pepper，non-helical
22C1425	solitary pod pepper，non-helical
22C1427	solitary pod pepper，non-helical
22C1430	solitary pod pepper，non-helical
22C1432	solitary pod pepper，non-helical
22C1433	solitary pod pepper，non-helical
22C1434	solitary pod pepper，non-helical
22C1440	solitary pod pepper，non-helical
22C1442	solitary pod pepper，non-helical
22C1444	solitary pod pepper，non-helical
22C1448	solitary pod pepper，non-helical
22C1450	solitary pod pepper，non-helical
22C1452	solitary pod pepper，non-helical
22C1454	solitary pod pepper，non-helical
22C1456	solitary pod pepper，non-helical
22C1484	solitary pod pepper，non-helical
22C1486	solitary pod pepper，non-helical
22C1488	self-pruningpod pepper，non-helical
22C1489	self-pruningpod pepper，non-helical
22C1490	self-pruningpod pepper，non-helical
22C1491	self-pruningpod pepper，non-helical
22C1495	self-pruningpod pepper，non-helical
22C1498	self-pruningpod pepper，non-helical
22C1509	self-pruningpod pepper，non-helical
22C1510	self-pruningpod pepper，non-helical
22C1516	cone-shaped，non-helical
22C1519	self-pruningpod pepper，non-helical
22C1520	self-pruningpod pepper (a sister line of 22C1458)，non-helical
22C1521	self-pruningpod pepper，non-helical
22C1526	self-pruningpod pepper，non-helical
22C1537	self-pruning, pod pepper，non-helical
22C1538	self-pruningpod pepper，non-helical
22C1539	self-pruningpod pepper，non-helical
22C1541	self-pruningpod pepper，non-helical
22C1543	self-pruningpod pepper，non-helical
22C1544	self-pruningpod pepper，non-helical
22C1550	self-pruningpod pepper，non-helical
22C1552	self-pruningpod pepper，non-helical
22C1554	self-pruningpod pepper，non-helical
22C1556	self-pruningpod pepper，non-helical
22C1558	self-pruningpod pepper，non-helical
22C1560	self-pruningpod pepper，non-helical
22C1562	self-pruningpod pepper，non-helical
22C1565	self-pruningpod pepper，non-helical
22C1567	self-pruningpod pepper，non-helical
22C1568	self-pruningpod pepper，non-helical
22C1569	self-pruningpod pepper，non-helical
22C1570	self-pruningpod pepper，non-helical
22C1571	self-pruningpod pepper，non-helical
22C1572	self-pruningpod pepper，non-helical
22C1573	self-pruningpod pepper，non-helical
22C1574	solitary pod pepper (a sister line of 22C1573)，non-helical
22C1575	solitary pod pepper，non-helical
22C1576	solitary pod pepper，non-helical
22C1577	solitary pod pepper，non-helical
22C1578	self-pruningpod pepper，non-helical
22C1579	self-pruningpod pepper，non-helical
22C1926	self-pruningpod pepper (a sister line of 22C1583)，non-helical
22C1586	self-pruningpod pepper，non-helical
22C1587	self-pruningpod pepper，non-helical
22C1589	self-pruningpod pepper，non-helical
22C1591	self-pruningpod pepper，non-helical
22C1592	solitary pod pepper，helical
22C1593	self-pruningpod pepper，non-helical
22C1595	self-pruningpod pepper，non-helical
22C1596	self-pruningpod pepper，non-helical
22C1597	self-pruningpod pepper，non-helical
22C1599	self-pruningpod pepper，non-helical
22C1602	self-pruningpod pepper，non-helical
22C1603	solitary pod pepper，non-helical
22C1604	self-pruningpod pepper，non-helical
22C1608	self-pruningpod pepper，non-helical
22C1611	solitary pod pepper，non-helical
22C1612	solitary pod pepper，helical
22C1613	solitary pod pepper，non-helical
22C1614	solitary pod pepper，non-helical
22C1618	small sheep horn-shaped，spicy，non-helical
22C1623	solitary pod pepper，helical
22C1624	solitary pod pepper (a sister line of 22C1625)，non-helical
22C1625	solitary pod pepper，non-helical
22C1692	small sheep horn-shaped，moderately spicy，non-helical
22C1696	sheep horn-shaped，moderately spicy，non-helical
22C1726	small sheep horn-shaped，moderately spicy，non-helical
22C1727	small sheep horn-shaped，moderately spicy (a sister line of 22C1726)，helical
22C1776	small sheep horn-shaped，moderately spicy，helical
22C1777	small sheep horn-shaped，moderately spicy (a sister line of 22C1726)，non-helical
22C1871	short slender-shaped，spicy，helical
22C1870	short slender-shaped，spicy，non-helical
22C1872	wild species，non-helical
22C1873	small sheep horn-shaped，spicy，helical
22C1875	small sheep horn-shaped，spicy，helical
22C1876	small sheep horn-shaped，spicy，helical
22C1878	small sheep horn-shaped，spicy，helical
22C1879	small sheep horn-shaped，spicy，non-helical
22Q4308	small sheep horn-shaped，spicy，non-helical
22Q4309	small sheep horn-shaped，spicy，non-helical
19C946-10	small sheep horn-shaped，spicy，non-helical
19C1385-1	small sheep horn-shaped，spicy，non-helical
22C1687	wild species，non-helical
22C1688	wild species，non-helical
22C1689	small sheep horn-shaped，spicy，helical
22C1690	small sheep horn-shaped，spicy (a sister line of 22C1689)，non-helical
22C1458	solitary pod pepper (select from a cross between Capsicum annuum and Capsicum frutescens)，non-helical
22C1459	solitary pod pepper (select from a cross between Capsicum annuum and Capsicum frutescens) (a sister line of 22C1458)，non-helical
22C1466	solitary pod pepper (select from a cross between Capsicum annuum and Capsicum frutescens) (a sister line of 22C1458)，non-helical
22C1477	solitary pod pepper (pedigree selection from a cross between Capsicum annuum and Capsicum chinense)，non-helical
22C1642	small sheep horn-shaped，selected from a cross between Capsicum chinense and Capsicum annuumspicy，non-helical
22C1645	Capsicum chinense，helical
22C1669	Capsicum chinense，non-helical
22C1678	Capsicum chinense，helical
22C1680	Capsicum chinense (sister line of 22C1679)，non-helical
22C1681	Capsicum chinense (sister line of 22C1679)，non-helical
22C1918	long sheep horn-shaped，moderately spicy，non-helical
22C686	NA
22C727	NA
22C753	NA
22C754	NA
22C1898	NA
22CF50	NA
22C770	NA
22C771	NA
22CF4	NA
22CF9	NA
22CF12	NA
22CF13	NA
22CF20	NA
22CF16	NA
22CF19	NA
22C1901	NA
22CF23	NA
22CF27	NA
22CF28	NA
22Q4051	NA
22Q4054	NA
22Q4061	NA
22Q4214	NA
ND1907	NA
22Q4107	NA
22Q4172	NA
22C851	NA
22C854	NA
22C855	NA
22C878	NA
22CF513	NA
22C949	NA
22C951	NA
22CF521	NA
22C957	NA
22C1013	NA
22C1952	NA
22CF85	NA
22C1130	NA
22C1166	NA
22C1181	NA
22C1206	NA
22C1234	NA
22C1278	NA
22C1317	NA
22C1318	NA
22C1330	NA
22C607	NA
22C1355	NA
22C1403	NA
22C1405	NA
22C1422	NA
22C1437	NA
22C1441	NA
22C1465	NA
22C1964	NA
22C1475	NA
22C1518	NA
22C1580	NA
22C1583	NA
22C1588	NA
22C1594	NA
22C1598	NA
22C1607	NA
22C1628	NA
22C1631	NA
22C1641	NA
22C1650	Capsicum chinense
22C1655	Capsicum chinense
22C1657	Capsicum chinense (sister line of 22C1655)
22C1659	Capsicum chinense (sister line of 22C1655)
22C1661	Capsicum chinense (sister line of 22C1655)
22C1666	Capsicum chinense
22C1672	Capsicum chinense
22C1673	Capsicum chinense (sister line of 22C1672)
22C1674	Capsicum chinense (sister line of 22C1672)
22C1679	Capsicum chinense
22C1686	Capsicum chinense

## Sheet: Table_S2
Zhang X, Wang G, Chen B, Du H, Zhang F, Zhang H, Wang Q, Geng S. Candidate genes for first flower node identified in pepper using combined SLAF-seq and BSA. PLoS One. 2018 Mar 20; 13(3): e0194071.
Li W, Cheng J, Wu Z, Qin C, Tan S, Tang X, Cui J, Zhang L, Hu K. An InDel-based linkage map of hot pepper (Capsicum annuum). Molecular Breeding. 2015 Jan; 35: 1-10.
Borovsky Y, Sharma VK, Verbakel H, Paran I. CaAP2 transcription factor is a candidate gene for a flowering repressor and a candidate for controlling natural variation of flowering time in Capsicum annuum. Theoretical and Applied Genetics. 2015 Jun; 128: 1073-82.
Li W, Cheng J, Wu Z, Qin C, Tan S, Tang X, Cui J, Zhang L, Hu K. An InDel-based linkage map of hot pepper (Capsicum annuum). Molecular Breeding. 2015 Jan; 35: 1-0.
Naresh P, Lin SW, Lin CY, Wang YW, Schafleitner R, Kilian A, Kumar S. Molecular markers associated to two non-allelic genic male sterility genes in peppers (Capsicum annuum L.). Frontiers in Plant Science. 2018 Oct 16; 9: 1343.
Cheng Q, Li T, Ai Y, Lu Q, Wang Y, Sun L, Shen H. Complementary transcriptomic and proteomic analysis reveals a complex network regulating pollen abortion in GMS (msc-1) pepper (Capsicum annuum L.). International Journal of Molecular Sciences. 2019 Apr 11; 20(7): 1789.
Tamisier L, Szadkowski M, Girardot G, Djian‐Caporalino C, Palloix A, Hirsch J, Moury B. Concurrent evolution of resistance and tolerance to potato virus Y in Capsicum annuum revealed by genome‐wide association. Molecular Plant Pathology. 2022 Feb; 23(2): 254-264.
Tan S, Cheng JW, Zhang L, Qin C, Nong DG, Li WP, Tang X, Wu ZM, Hu KL. Construction of an interspecific genetic map based on InDel and SSR for mapping the QTLs affecting the initiation of flower primordia in pepper (Capsicum spp.). PloS one. 2015 Mar 17; 10(3): e0119389.
Nimmakayala P, Lopez-Ortiz C, Shahi B, Abburi VL, Natarajan P, Kshetry AO, Shinde S, Davenport B, Stommel J, Reddy UK. Exploration into natural variation for genes associated with fruit shape and size among Capsicum chinense collections. Genomics. 2021 Sep 1; 113(5): 3002-14.
Hu F, Cheng J, Dong J, Zhong J, Zhou Z, Hu K. Fine mapping and candidate gene analysis of the up locus determining fruit orientation in pepper (Capsicum spp.). Theoretical and Applied Genetics. 2021 Sep;134(9):2901-2911.
Solomon AM, Kim TG, Han K, Lee HY, Patil A, Siddique MI, Ahn J, Kang BC. Fine mapping and candidate gene identification for the CapUp locus controlling fruit orientation in pepper (Capsicum spp.). Frontiers in Plant Science. 2021 Jun 28; 12: 675474.
Van Haperen P, Voorrips RE, Van Kaauwen M, Van Eekelen HD, De Vos RC, Van Loon JJ, Vosman B. Fine mapping of a thrips resistance QTL in Capsicum and the role of diterpene glycosides in the underlying mechanism. Theoretical and Applied Genetics. 2021 May; 134: 1557-1573.
Cheng J, Chen Y, Hu Y, Zhou Z, Hu F, Dong J, Chen W, Cui J, Wu Z, Hu K. Fine mapping of restorer-of-fertility gene based on high-density genetic mapping and collinearity analysis in pepper (Capsicum annuum L.). Theoretical and Applied Genetics. 2020 Mar; 133: 889-902.
Jo YD, Ha Y, Lee JH, Park M, Bergsma AC, Choi HI, Goritschnig S, Kloosterman B, Van Dijk PJ, Choi D, Kang BC. Fine mapping of Restorer-of-fertility in pepper (Capsicum annuum L.) identified a candidate gene encoding a pentatricopeptide repeat (PPR)-containing protein. Theoretical and applied genetics. 2016 Oct; 129: 2003-2017.
Liu J, Ai X, Wang Y, Lu Q, Li T, Wu L, Sun L, Shen H. Fine mapping of the Ca3GT gene controlling anthocyanin biosynthesis in mature unripe fruit of Capsicum annuum L. Theoretical and Applied Genetics. 2020 Sep; 133: 2729-42.
Wang G, Chen B, Du H, Zhang F, Zhang H, Wang Y, He H, Geng S, Zhang X. Genetic mapping of anthocyanin accumulation-related genes in pepper fruits using a combination of SLAF-seq and BSA. PLoS One. 2018 Sep 27; 13(9): e0204690.
Wahyuni Y, Stahl-Hermes V, Ballester AR, de Vos RC, Voorrips RE, Maharijaya A, Molthoff J, Zamora MV, Sudarmonowati E, Arisi AC, Bino RJ. Genetic mapping of semi-polar metabolites in pepper fruits (Capsicum sp.): towards unravelling the molecular regulation of flavonoid quantitative trait loci. Molecular Breeding. 2014 Mar;33:503-518.
Tamisier L, Szadkowski M, Nemouchi G, Lefebvre V, Szadkowski E, Duboscq R, Santoni S, Sarah G, Sauvage C, Palloix A, Moury B. Genome‐wide association mapping of QTLs implied in potato virus Y population sizes in pepper: evidence for widespread resistance QTL pyramiding. Molecular plant pathology. 2020 Jan; 21(1): 3-16.
Nimmakayala P, Abburi VL, Saminathan T, Almeida A, Davenport B, Davidson J, Reddy CC, Hankins G, Ebert A, Choi D, Stommel J. Genome-wide divergence and linkage disequilibrium analyses for Capsicum baccatum revealed by genome-anchored single nucleotide polymorphisms. Frontiers in plant science. 2016 Nov 3;7:1646.
Nimmakayala P, Abburi VL, Saminathan T, Alaparthi SB, Almeida A, Davenport B, Nadimi M, Davidson J, Tonapi K, Yadav L, Malkaram S. Genome-wide diversity and association mapping for capsaicinoids and fruit weight in Capsicum annuum L. Scientific reports. 2016 Nov 30; 6(1): 38081.
Lozada DN, Nunez G, Lujan P, Dura S, Coon D, Barchenger DW, Sanogo S, Bosland PW. Genomic regions and candidate genes linked with Phytophthora capsici root rot resistance in chile pepper (Capsicum annuum L.). BMC Plant Biology. 2021 Dec; 21(1): 1-14.
Manivannan A, Choi S, Jun TH, Yang EY, Kim JH, Lee ES, Lee HE, Kim DS, Ahn YK. Genotyping by sequencing-based discovery of SNP markers and construction of linkage map from F5 population of pepper with contrasting powdery mildew resistance trait. BioMed Research International. 2021 Mar 15; 2021.
Siddique MI, Lee JH, Ahn JH, Kusumawardhani MK, Safitri R, Harpenas A, Kwon JK, Kang BC. Genotyping-by-sequencing-based QTL map** reveals novel loci for Pepper yellow leaf curl virus (PepYLCV) resistance in Capsicum annuum. PLoS One. 2022 Feb 17; 17(2): e0264026.
Pierre M, Noel L, Lahaye T, Ballvora A, Veuskens J, Ganal M, Bonas U. High-resolution genetic mapping of the pepper resistancelocus Bs3 governing recognition of the Xanthomonascampestris pv vesicatora AvrBs3 protein. Theoretical and Applied Genetics. 2000 Jul; 101: 255-263.
Du H, Wen C, Zhang X, Xu X, Yang J, Chen B, Geng S. Identification of a major QTL (qRRs-10.1) that confers resistance to Ralstonia solanacearum in pepper (Capsicum annuum) using SLAF-BSA and QTL mapping. International journal of molecular sciences. 2019 Nov 23; 20(23): 5887.
Cheng Q, Wang P, Liu J, Wu L, Zhang Z, Li T, Gao W, Yang W, Sun L, Shen H. Identification of candidate genes underlying genic male-sterile msc-1 locus via genome resequencing in Capsicum annuum L. Theoretical and Applied Genetics. 2018 Sep; 131: 1861-1872.
Reddy UK, Almeida A, Abburi VL, Alaparthi SB, Unselt D, Hankins G, Park M, Choi D, Nimmakayala P. Identification of gene-specific polymorphisms and association with capsaicin pathway metabolites in Capsicum annuum L. collections. PloS one. 2014 Jan 27; 9(1): e86393.
Kim Y, Kim GW, Han K, Lee HY, Jo J, Kwon JK, Lemmon Z, Lippman Z, Kang BC. Identification of Genetic Factors Controlling the Formation of Multiple Flowers Per Node in Pepper (Capsicum spp.). Frontiers in Plant Science. 2022 May 9; 13: 884338.
Park D, Barka GD, Yang EY, Cho MC, Yoon JB, Lee J. Identification of QTLs controlling α-glucosidase inhibitory activity in pepper (Capsicum annuum l.) leaf and fruit using genotyping-by-sequencing analysis. Genes. 2020 Sep 23; 11(10): 1116.
Siddique MI, Lee HY, Ro NY, Han K, Venkatesh J, Solomon AM, Patil AS, Changkwian A, Kwon JK, Kang BC. Identifying candidate genes for Phytophthora capsici resistance in pepper (Capsicum annuum) via genotyping-by-sequencing-based QTL mapping and genome-wide association study. Scientific Reports. 2019 Jul 10; 9(1): 9962.
Solomon AM, Kim TG, Han K, Lee HY, Patil A, Siddique MI, Ahn J, Kang BC. Fine mapping and candidate gene identification for the CapUp locus controlling fruit orientation in pepper (Capsicum spp.). Frontiers in Plant Science. 2021 Jun 28;12:675474.
Lv J, Liu Y, Liu Z, Wang J, Ma Y, Zhang Z, Yang S, Ou L, Chen W, Zou X. Mapping and identifying candidate genes involved in the novel fasciculate inflorescence in pepper (Capsicum annuum L.). Molecular Breeding. 2019 Nov; 39: 1-11.
Wang P, Wang L, Guo J, Yang W, Shen H. Molecular mapping of a gene conferring resistance to Phytophthora capsici Leonian race 2 in pepper line PI201234 (Capsicum annuum L.). Molecular Breeding. 2016 Jun; 36: 1-11.
Cheng Q, Li T, Ai Y, Lu Q, Wang Y, Wu L, Liu J, Sun L, Shen H. Phenotypic, genetic, and molecular function of msc-2, a genic male sterile mutant in pepper (Capsicum annuum L.). Theoretical and Applied Genetics. 2020 Mar; 133: 843-855.
Han K, Lee HY, Ro NY, Hur OS, Lee JH, Kwon JK, Kang BC. QTL mapping and GWAS reveal candidate genes controlling capsaicinoid content in Capsicum. Plant biotechnology journal. 2018 Sep; 16(9): 1546-1558.
Maharijaya A, Vosman B, Steenhuis-Broers G, Pelgrom K, Purwito A, Visser RG, Voorrips RE. QTL mapping of thrips resistance in pepper. Theoretical and Applied Genetics. 2015 Oct; 128: 1945-1956.
Hill TA, Chunthawodtiporn J, Ashrafi H, Stoffel K, Weir A, Van Deynze A. Regions underlying population structure and the genomics of organ size determination in Capsicum annuum. The plant genome. 2017 Nov; 10(3): plantgenome2017-03.
Kang YJ, Ahn YK, Kim KT, Jun TH. Resequencing of Capsicum annuum parental lines (YCM334 and Taean) for the genetic analysis of bacterial wilt resistance. BMC Plant Biology. 2016 Dec; 16(1): 1-9.
Du H, Yang J, Chen B, Zhang X, Zhang J, Yang K, Geng S, Wen C. Target sequencing reveals genetic diversity, population structure, core-SNP markers, and fruit shape-associated loci in pepper varieties. BMC plant biology. 2019 Dec; 19(1): 1-16.
Yuan X, Fang R, Zhou K, Huang Y, Lei G, Wang X, Chen X. The APETALA2 homolog CaFFN regulates flowering time in pepper. Horticulture Research. 2021 Dec 1; 8.
Lee HY, Ro NY, Patil A, Lee JH, Kwon JK, Kang BC. Uncovering candidate genes controlling major fruit-related traits in pepper via genotype-by-sequencing based QTL mapping and genome-wide association study. Frontiers in Plant Science. 2020 Jul 23; 11: 1100.
Esposito S, Aiese Cigliano R, Cardi T, Tripodi P. Whole-genome resequencing reveals genomic footprints of Italian sweet and hot pepper heirlooms giving insight into genes underlying key agronomic and qualitative traits. BMC Genomic Data. 2022 Dec; 23(1): 1-16.
Yoshiyuki Tanaka, Hirotsugu Yoneda, Munetaka Hosokawa, Tetsuya Miwa, Susumu Yazawa, Ma YH, Kong QS. Application of marker-assisted selection in breeding of a new fresh pepper cultivar (Capsicum annuum) containing capsinoids, low-pungent capsaicinoid analogs[J]. Chili Magazine, 2014(4): 45-49.
Guan JJ, Zhang JH, Zhang H, Ma FR, Yang XH, Wang JM. Screening SSR Core Primers for Pepper Germplasm Hybrid Purity Identification[J]. Biotechnology Bulletin, 2014, 30(9): 97-101.
Kethom W, Tongyoo P, Mongkolporn O. Genetic diversity and capsaicinoids content association of Thai chili landraces analyzed by whole genome sequencing-based SNPs. Scientia Horticulturae. 2019 Apr 30; 249:401-406.
Cao HY. SCAR marker development for rapid identification of root-knot nematode resistance gene Me3 in pepper [D]. Chinese Academy of Agricultural Sciences, 2019.
Wei Bingqiang, Wang Yongfu, Zhang Gaoyuan, Ye Deyou. (2022). Screening of KASP-labeled primers for capsicum CMS restorer lines and their application. Publication number: CN112725495B.
Bai R, Zhang Z, Cao Y, Yu H, Zhu Y, Liu J, Zhang N, Wang L, Zhang B. QTLMapping Analysis of Powdery Mildew Resistance in Pepper. China Vegetables [J]. 2019(11): 23-29.
Shen Huolin, Wang Peng(2020). Application of Molecular Markers and Polymorphisms in Identifying Pollen Fertility of Pepper. Publication number: CN107190094B.
Shen Huolin, Wang Peng, Liu Jinqiu(2020). Application of Molecular Markers in Identifying Hairs in Pepper Plants. Publication number: CN107746897B.
Wang X. Fine Mapping of the Root-knot Nematode Resistance Gene Me1 in Pepper (Capsicum annuum L.). Chinese Academy of Agricultural Sciences [D]. 2016.
Liu J, Guo S, Zhang W, Shen H. Mixed Major Gene and Polygene Inheritance Analysis of Fruit Firmness in Pepper. Southwest China Journal of Agricultural Sciences [J]. 2011, 24(4): 1464-1468.
Ma N, Bao S, Lian Q, Shen H. Cloning and bioinformatics analysis of PAP3 gene related to organ development in pepper flowers. Jiangsu Agricultural Sciences [J]. 2016, 44(07): 52-55.
Yang J, Wang W, Shen H. SSR Marker Mapping and Marker-Assisted Selection of Rf Gene in Pepper. China Cucurbits And Vegetables [J]. 2010, 23(5): 1-5.
Gao S, Li N, Wang F, JUNTAWONG Niran, Jiao C, Yao M. Establishment and Application of Duplex PCR to Detection of Bacterial Spot Disease Resistance Genes Bs2 and Bs3 in Pepper. Northern Horticulture [J]. 2020(13): 9-15.
Liu Y, Zhang Z, Cao Y, Zhao H, Wang L, Zhang B. Mapping of Major QTLs Resistant to Anthracnose(Colletotrichum acutatum) in Pepper(Capsicum spp.) and Marker Development. China Vegetables [J]. 2016(11): 20-24.
Meng Y, Yan L, Zhang H, Zhao H, Fan Y. Screening and Detection of Resistance to Phytophthora Blight Gene in Pepper Using Molecular Markers. Acta Agriculturae Boreali-Sinica [J]. 2020, 35(S01): 338-341.
Liu X, Yan J, Wang P, Zhang J, Shen H. Genetic Inheritance and Gene Mapping of Pepper Trichomes Traits. China Vegetables [J]. 2015(12): 19-24.
Yuan Xinjie, Chen Xuejun, Fang Rong, Zhou Kunhua. (2021). Pepper maturity SNP molecular marker and its application. Publication number: CN108486276B.
Zhang Zhenghai, Wang Lihao, Cao Yacong, Yu Hailong, Zhang Baoxi, Zhu Yanshu. (2022). SNP markers related to cytoplasmic male sterility restoration traits of pepper and their specific primers and applications. Publication number: CN110468225B.
Liu J, Zhang W, Shen HL.Construction of Pepper Genetic Map and QTL Analysis of Fruit Firmness[J]. China Vegetables, 2011, (08) : 17-21.
Zhang Zhenghai, Cao Yacong, Yu Hailong, Wang Lihao, Zhang Baoxi. (2022). SNP marker 5-156 of pepper Phytophthora resistance gene and its specific primers and application. Publication number: CN110358855B.
Wang Lihao, Zhang Zhenghai, Cao Yacong, Yu Hailong, Zhang Baoxi. (2022). SNP marker 5-160 related to pepper blight resistance gene and its specific primers and application. Publication number: CN110283929B.
Liu Ziji, Cao Zhenmu, Yang Yan, Liu Zhaohua, Liu Weixia. (2015). Purity detection of pepper hybrids EST-SSR molecular markers and its application. Publication number: CN103642906B.
Li N, Gong LY, Gao SH, Yin YX, Yu CY, Wang F, Chen C, Wu J, Jiao CH, Yao MH. Detection of Resistance Gene of Capsicum spp.Germplasm by Molecular Markers[J]. China Vegetables, 2020, (08) : 19-32.
Qin Lei, Liang Yan, Mo Ning, Zhang Yang, Zhao Guiye. Identification and Gvaluation of Resistance to TMV in pepper(Capsicum annum L.) Germplasm Resources [J]. China Vegetables, 2017, (10) : 44-50.
Guo Guangjun, Zhu Xuemei, Pan Baogui, Diao Weiping, Liu Jinbing, Gao Changzhou, Wang Shubin. Innovation of pepeer germplsm resource with resistance to cucumber mosaic virus by InDel Molecular marker assisted selection[J]. Jiangsu Journal of Agriculture, 2021, 37 (05) : 1251-1261.
Li Huiling, Dong Jie, Zhang Guoru, Huo Shunli, Ye Yuanrong, Du Shanshan, Zhang Jianwen. Optimization and primer screening of InDel-PCR reaction system for pigment pepper[J]. Jiangsu Agricultural Science, 2021, 49(18): 72-76.
Zhao Hong. Evaluation of core chili germplasm in China and genome-wide association analysis of its main horticultural traits [D]. Chinese Academy of Agricultural Sciences [2024-03-07].
Shen Huolin, Liu Jinqiu. (2022). Development and application of a gene marker regulating the purple color of chili peppers. Publication number: CN109628635B.
Wen Changlong, Zhang Jian, Yang Jingjing, Zhang Xiaofei, Luo Jiang, Li Xiangjing. (2021). A SNP locus, primer set, and application for identifying the purity of chili hybrid varieties. Publication number: CN112195265B.
Yu Hailong, Wang Lihao, Cao Yacong, Cheng Feng, Zhang Kang, Zhang Baoxi, Zhang Zhenghai, Feng Xigang, Jin Yuan, Jing Yaxin. (2022). A closely linked SNP locus with capsaicin content in chili peppers, its CAPS molecular marker and its application. Publication number: CN113151568B.
Zhang Jinglong, Ma Jianping, Wang Qingfeng. (2019). InDel labeling and identification method for purity of a hybrid chili pepper. Publication number: CN109321674A.
Guo Guangjun, Wang Shubin, Pan Baogui, Diao Weiping, Liu Jinbing, Gao changzhou. (2021). A primer pair for identifying CMV resistance and susceptibility in chili peppers and its application. Publication number: CN113502347A.
Ou Lijun, Lv Junheng, Liu Zhoubin, Liu Yuhua, Chen Wenchao, Zou Xuexiao, Yu Huiyang, Chen Rong, Ou Yangbo,Li Feng. (2022). An Indel molecular marker, primer, and application closely linked to pepper cluster inflorescence gene. Publication number: CN110592255B.
Ouyang Bo, Chen Rong, Yu Huiyang, Li Feng, Chen Wenchao, Ou Lijun, Zou Xuexiao. (2021). A SNP locus closely associated with chili fruit orientation and its universal molecular marker, acquisition method, and application. Publication number: CN110305978B.
Cheng Jiaowen, Wu Zhiming, Dong Jichi, Hu Kailin. (2022). A SNP molecular marker associated with pepper nuclear sterility and its application. Publication number: CN109750118B.
Shen Huolin, Wang Pingyong. (2017). A molecular marker closely linked to pepper disease resistance genes and its application. Publication number: CN104878093B.
Shen Huolin, Cheng Qing. (2019). A gene molecular marker co isolated with the male sterile gene msc-2 in chili pepper cell nucleus and its application. Publication number: CN109468410A.
Ouyang Bo, Jia Quanrui, Yu Huiyang, Zhou Yuhong, Liufeng, Chen Wenchao, Li Feng, Zou Xuexiao. (2021). A molecular marker closely linked to the restoration gene of cytoplasmic male sterility in chili pepper and its acquisition method and application. Publication number: CN108754013B.
Ou Lijun, Liu Yuhua, Yang Bozhi, Chen Wenchao, Zhang Zhuqing, Zhou Shudong, Yang Sha, Li Xuefeng, Ma Yanqing, Dai Xiongze, Zou Xuexiao. (2021). A molecular marker linked to the green retention gene in chili peppers and its application. Publication number: CN109207622B.
Wang Lihao, Cao Yacong, Cheng Feng, Zhang Kang, Yu Hailong, Zhang Baoxi, Zhang Zhenghai, Jing Yaxin, Jin Yuan, Zhang Weili, Chen Shumin. (2022). Specific primers and applications of molecular markers closely related to fruit shape index. Publication number: CN112831589B.
Zhang Xiaofen, Geng Sansheng, Chen Bin, Du Heshan, Wang Yixin. (2022). SNP molecular marker KQ8-4472 linked to genes controlling Vc content in chili fruits and its application and specialized primers. Publication number: CN113981126B.
Cao Yacong, Wang Lihao, Yu Hailong, Cheng Feng, Zhang Baoxi, Zhang Zhenghai, Zhang Kang, Chen Shumin, Zhang Weili, Jing Yaxin. (2022). SNPs closely linked to the control of capsaicin content in chili fruits and their specific primers and applications. Publication number: CN113215299B.
Zhang Xiaofen, Geng Sansheng, Chen Bin, Sun Honghe. (2018). Molecular marker genSSR3000 closely linked to pepper CMV resistance gene and its acquisition and application. Publication number: CN105368927B.
Zhang Qiang, Wei Xiaochun, Yao Qiuju, Chang Xiaoke, Yang Shuangjuan, Wang Zhiyong, Zhao Yanyan, Zhang Xiaowei, Yuan Yuxiang, Jiang Wusheng, Zheng Zhi. (2021). Molecular markers, methods, and applications closely linked to pepper infertility recovery genes. Publication number: CN107312870B.
Zhang Xiaofen, Geng Sansheng, Chen Bin, Du Heshan. (2016). Molecular marker GSSR187 closely linked to the yellow gene of pepper anthers and its application. Publication number: CN106148530A.
Zhang Baoxi, Wang Lihao, Zhang Zhenghai, Cao Yacong, Wang Xingxing. (2019). Molecular markers closely linked to pepper resistance to cucumber mosaic virus and their applications. Publication number: CN105907755B.
Zhang Zhenghai, Zhang Baoxi, Wang Lihao, Cao Yacong. (2017). SNP markers related to chili spiciness and their applications. Publication number: CN107151709A.

## Sheet: Table_S3
QTL	Gene ID	Start（bp）	End（bp）	Annotation
heli2.1	Capann_59V1aChr02g007090	89206974	89207406	Probable LRR receptor-like serine/threonine-protein kinase
heli2.1	Capann_59V1aChr02g007100	89772628	89773092	Probable L-type lectin-domain containing receptor kinase
heli2.1	Capann_59V1aChr02g007100	89779394	89779720	ATP synthase subunit alpha
heli2.1	Capann_59V1aChr02g007120	89864994	89869822	UPF0308 protein At2g37240
heli2.1	Capann_59V1aChr02g007130	89967213	89968205	Phytosulfokines 3
heli2.1	Capann_59V1aChr02g007140	89968733	89969785	PHLOEM PROTEIN 2-LIKE A10
heli2.1	Capann_59V1aChr02g007150	89981934	89982122	Receptor-like protein 12
heli2.1	Capann_59V1aChr02g007160	89994870	89995782	esterase KAI2-like
heli2.1	Capann_59V1aChr02g007170	90001100	90001435	Unknow protein
heli2.1	Capann_59V1aChr02g007180	90172420	90178170	Unknow protein
heli2.1	Capann_59V1aChr02g007190	90226647	90238413	Telomere repeat-binding factor 1
heli2.1	Capann_59V1aChr02g007200	90244155	90247648	ADP-ribosylation factor-like protein
heli2.1	Capann_59V1aChr02g007210	90262359	90267431	Adenylyl-sulfate kinase
heli2.1	Capann_59V1aChr02g007220	90376508	90377145	60S ribosomal protein
heli2.1	Capann_59V1aChr02g007230	90383225	90389357	Calcium-transporting ATPase 4
heli2.1	Capann_59V1aChr02g007240	90428277	90428516	Weak chloroplast movement under blue light
heli2.1	Capann_59V1aChr02g007250	90429558	90430147	Unknow protein
heli2.1	Capann_59V1aChr02g007260	90446428	90449643	N-acetyltransferase HLS1
heli2.1	Capann_59V1aChr02g007270	90511878	90512189	Mitochondrial rRNA methyltransferase
heli2.1	Capann_59V1aChr02g007280	90586006	90586359	Receptor-like protein 12
heli2.1	Capann_59V1aChr02g007290	90596331	90606020	Casein kinase II subunit alpha
heli2.1	Capann_59V1aChr02g007300	90859208	90859800	Unknow protein
heli2.1	Capann_59V1aChr02g007310	91027827	91028828	Unknow protein
heli2.1	Capann_59V1aChr02g007320	91030067	91034392	BTB/POZ domain-containing protein At5g67385
heli2.1	Capann_59V1aChr02g007330	91047296	91047772	Unknow protein
heli11.1	Capann_59V1aChr11g004640	10723035	10723581	Aquaporin NIP
heli11.1	Capann_59V1aChr11g004650	10815874	10818032	Yae1 domain-containing protein
heli11.1	Capann_59V1aChr11g004660	10878910	10882884	Unknow protein
heli11.1	Capann_59V1aChr11g004670	10883836	10890430	Leucine-rich repeat and IQ domain-containing protein
heli11.1	Capann_59V1aChr11g004680	10899499	10899780	Tubulin alpha chain
heli11.1	Capann_59V1aChr11g004690	10935590	10936204	F-box protein At2g27310
heli11.1	Capann_59V1aChr11g004700	10944093	10945978	Unknow protein
heli11.1	Capann_59V1aChr11g004710	10957873	10962334	Unknow protein
heli11.1	Capann_59V1aChr11g004720	10989602	11001943	TOBAC Bifunctional nitrilase/nitrile hydratase NIT4A
heli11.1	Capann_59V1aChr11g004730	11062120	11062545	Unknow protein
heli11.1	Capann_59V1aChr11g004740	11074911	11076104	Unknow protein
heli11.1	Capann_59V1aChr11g004750	11147337	11147627	leucine-rich repeat receptor-like protein kinase
heli11.1	Capann_59V1aChr11g004760	11148148	11157040	Unknow protein
heli11.1	Capann_59V1aChr11g004770	11224165	11230427	NAC domain-containing protein
heli11.1	Capann_59V1aChr11g004780	11251953	11252228	Unknow protein
heli11.1	Capann_59V1aChr11g004790	11268083	11268928	CCR4-associated factor 1 homolog
heli11.1	Capann_59V1aChr11g004800	11274157	11274654	Unknow protein
heli11.1	Capann_59V1aChr11g004810	11281712	11284538	Protein FAM210B
heli11.1	Capann_59V1aChr11g004820	11284472	11291699	Transcription factor E2FB
heli11.1	Capann_59V1aChr11g004830	11295557	11296762	Unknow protein
heli11.1	Capann_59V1aChr11g004840	11297489	11297764	Unknow protein
heli11.1	Capann_59V1aChr11g004850	11298131	11298709	Group II intron-encoded protein ltrA
heli11.1	Capann_59V1aChr11g004860	11309677	11310531	Protein ycf2
heli11.1	Capann_59V1aChr11g004870	11315631	11315891	Unknow protein
heli11.1	Capann_59V1aChr11g004880	11317056	11318196	Putative membrane protein ycf1
heli11.1	Capann_59V1aChr11g004890	11326505	11331512	Unknow protein
heli11.1	Capann_59V1aChr11g004900	11337946	11343284	Uridine 5'-monophosphate synthase
heli11.1	Capann_59V1aChr11g004910	11351634	11360525	Ubiquitin-like-conjugating enzyme
heli11.1	Capann_59V1aChr11g004920	11363685	11364764	Aspartic proteinase nepenthesin-2
heli11.1	Capann_59V1aChr11g004930	11371524	11372168	Unknow protein
heli11.1	Capann_59V1aChr11g004940	11402098	11402877	Unknow protein
heli11.1	Capann_59V1aChr11g004950	11495248	11497320	Putative late blight resistance protein homolog
heli11.1	Capann_59V1aChr11g004960	11497354	11497851	Putative late blight resistance protein
heli11.1	Capann_59V1aChr11g004970	11499091	11505761	Methyl-CpG-binding domain-containing protein
heli11.1	Capann_59V1aChr11g004980	11572375	11573160	E3 ubiquitin-protein ligase PUB23
heli11.1	Capann_59V1aChr11g004990	11597551	11602934	Ubiquitin-like modifier-activating enzyme atg7
heli11.1	Capann_59V1aChr11g005000	11649612	11650502	Unknow protein
heli11.1	Capann_59V1aChr11g005010	11657786	11660680	GPI ethanolamine phosphate transferase 3
heli11.1	Capann_59V1aChr11g005020	11698348	11700396	Cysteine-rich receptor-like protein kinase 2
heli11.1	Capann_59V1aChr11g005030	11703636	11716000	Cysteine-rich receptor-like protein kinase 2
heli11.1	Capann_59V1aChr11g005040	11738358	11738567	Cysteine-rich receptor-like protein kinase 2
heli11.1	Capann_59V1aChr11g005050	11750392	11756683	BEL1-like homeodomain protein
heli11.1	Capann_59V1aChr11g005060	11858152	11865589	Uncharacterized basic helix-loop-helix protein At1g64625
heli11.1	Capann_59V1aChr11g005070	11918529	11921907	Aluminum-activated malate transporter 2
heli11.1	Capann_59V1aChr11g005080	11927466	11934498	Mitochondrial import inner membrane translocase subunit TIM22
heli11.1	Capann_59V1aChr11g005090	11985572	11991210	Aluminum-activated malate transporter 2
heli11.1	Capann_59V1aChr11g005100	12021179	12021541	Unknow protein
heli11.1	Capann_59V1aChr11g005110	12043061	12043729	Unknow protein
heli11.1	Capann_59V1aChr11g005120	12060836	12061273	Unknow protein
heli11.1	Capann_59V1aChr11g005130	12104741	12105805	Pentatricopeptide repeat-containing protein
heli11.1	Capann_59V1aChr11g005140	12144031	12146432	Apoptosis-inducing factor homolog A
heli11.1	Capann_59V1aChr11g005150	12167705	12168112	Trehalose-phosphate phosphatase
heli11.1	Capann_59V1aChr11g005160	12171962	12179920	Serine/threonine-protein kinase Nek5
heli11.1	Capann_59V1aChr11g005170	12184871	12188263	FAD-linked sulfhydryl oxidase ERV1
heli11.1	Capann_59V1aChr11g005180	12196429	12196845	Unknow protein
heli11.1	Capann_59V1aChr11g005190	12212163	12214715	Unknow protein
heli11.1	Capann_59V1aChr11g005200	12282227	12284443	Unknow protein
heli11.1	Capann_59V1aChr11g005210	12355232	12355339	Chitinase 2
heli11.1	Capann_59V1aChr11g005220	12442474	12442884	Histone H4
heli11.1	Capann_59V1aChr11g005230	12463149	12466415	Hyoscyamine 6-dioxygenase
heli11.1	Capann_59V1aChr11g005240	12613850	12614134	Unknow protein
heli11.1	Capann_59V1aChr11g005250	12682259	12682788	FAD-linked sulfhydryl oxidase
heli11.1	Capann_59V1aChr11g005260	12689284	12689460	Unknow protein
heli11.2	Capann_59V1aChr11g015530	182621345	182621673	Unknow protein
heli11.2	Capann_59V1aChr11g015540	182730460	182731541	Unknow protein
heli11.2	Capann_59V1aChr11g015550	182778323	182778751	Unknow protein
heli11.2	Capann_59V1aChr11g015560	182847368	182847802	Unknow protein
heli11.2	Capann_59V1aChr11g015570	182893838	182898489	ABC transporter C family member 8
heli11.2	Capann_59V1aChr11g015580	182906693	182907661	Unknow protein
heli11.2	Capann_59V1aChr11g015590	183078552	183082905	Mitochondrial carrier protein MTM1
heli11.2	Capann_59V1aChr11g015600	183220842	183227331	E3 ubiquitin-protein ligase MIB1
heli11.2	Capann_59V1aChr11g015610	184283685	184294794	Protein MEI2-like 4
heli11.2	Capann_59V1aChr11g015620	184321703	184322179	Putative membrane protein ycf1
